# Supplementary figures and images for: Antimicrobial Susceptibility and Molecular Features of Colonizing Isolates of Pseudomonas aeruginosa and the Report of a Novel Sequence Type (ST) 3910 from Thailand
Source: MDPI journal article supplement (doi:10.3390/antibiotics12010165), 2023-01-12

Tree  
(370 strains)

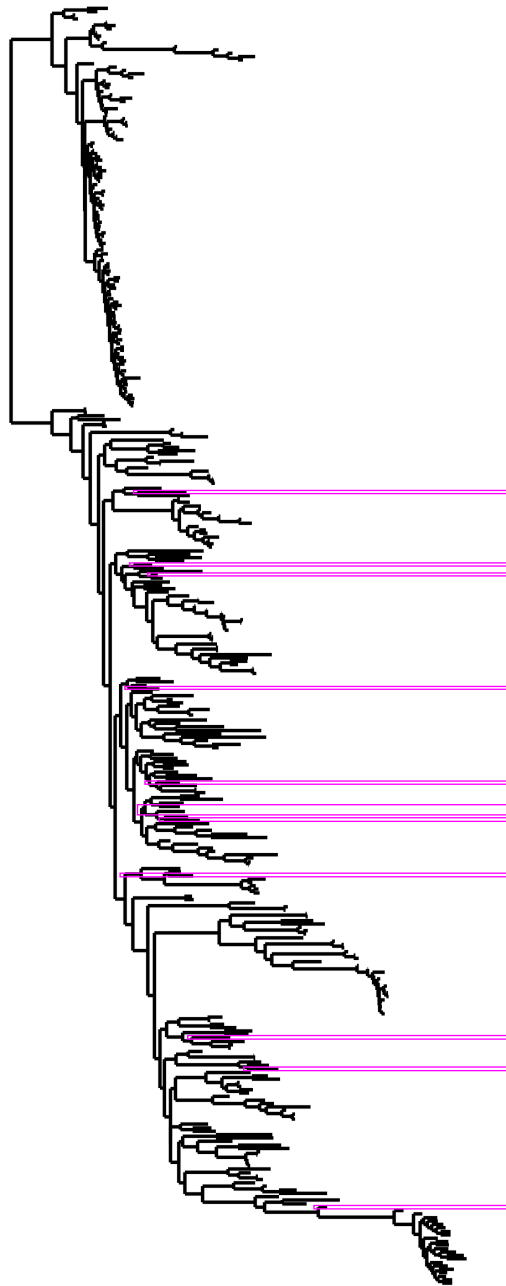

Roary matrix  
(35430 gene clusters)

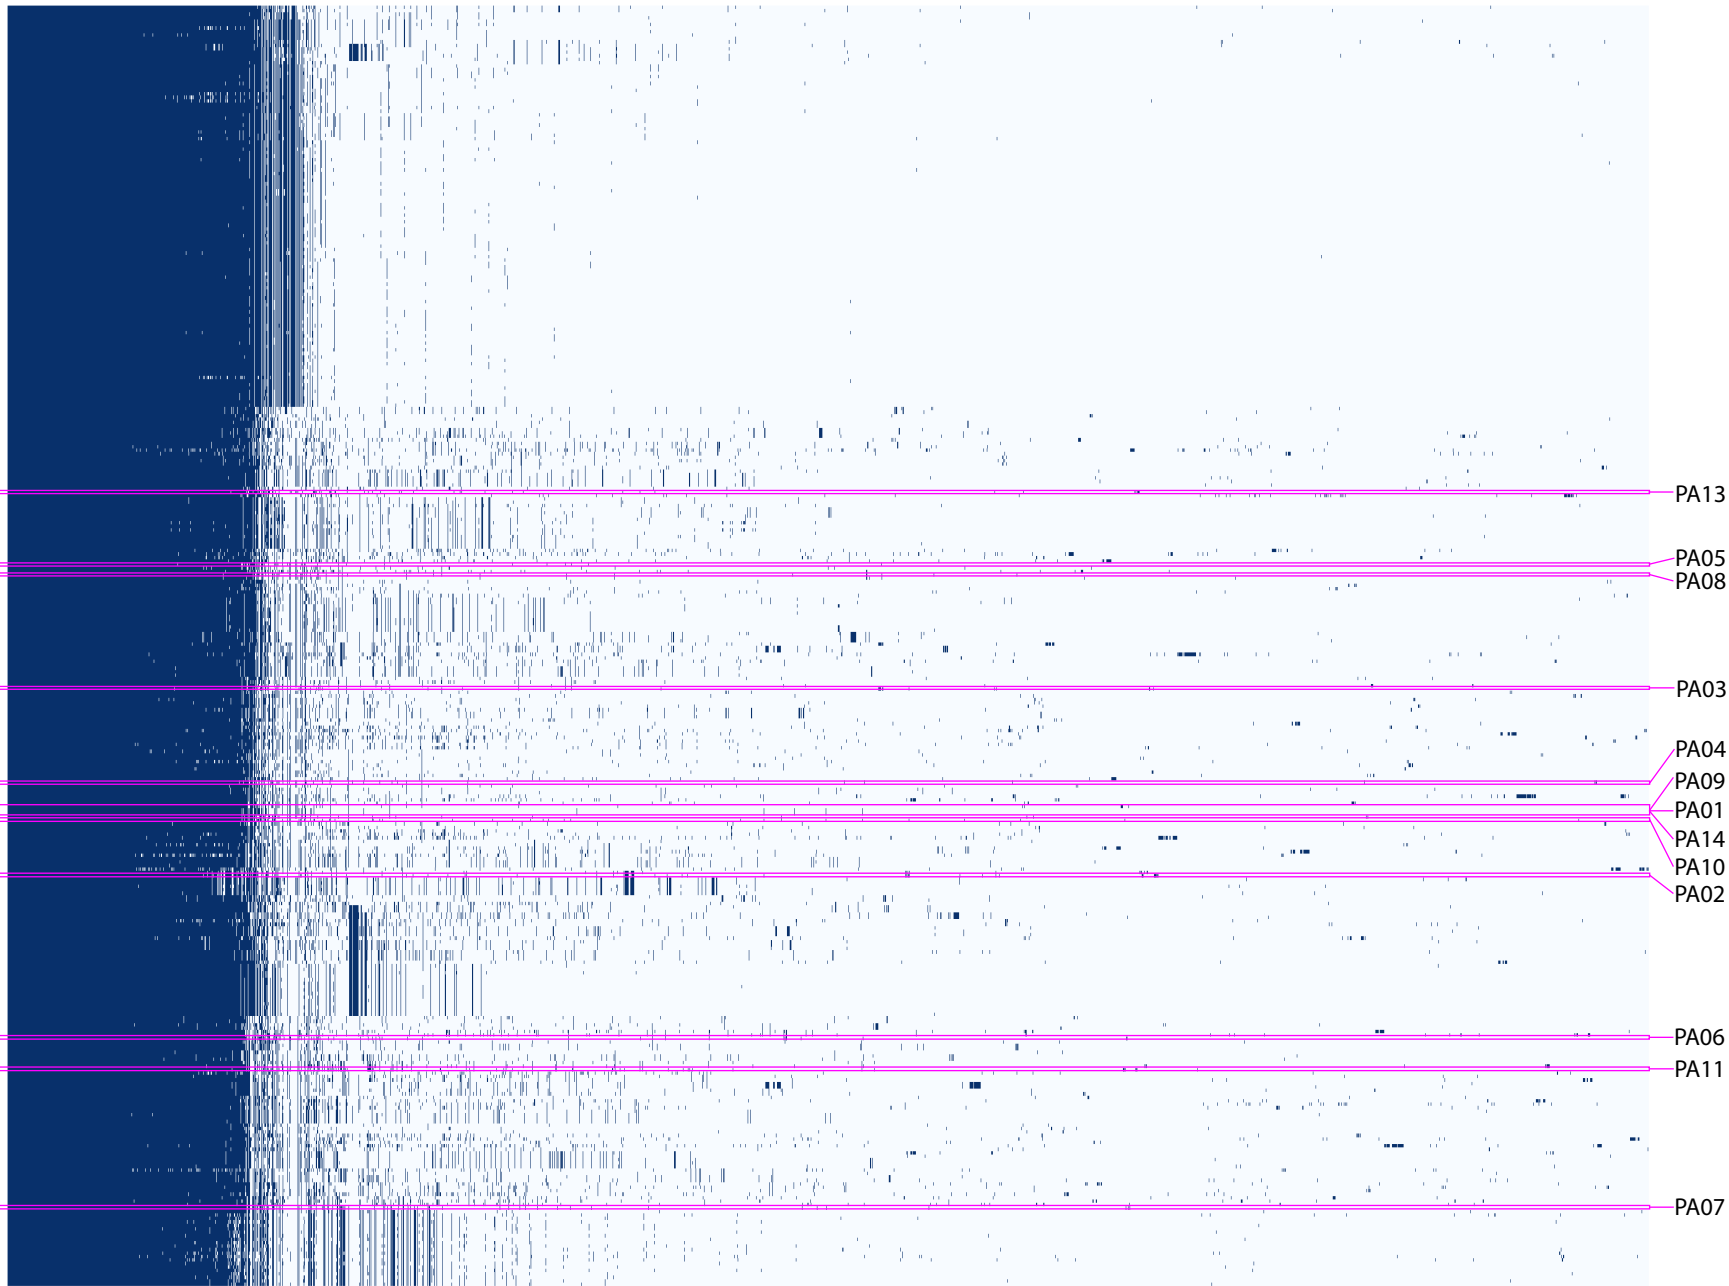

Supplement: s1 [file s1]

# BUSCO Assessment Results

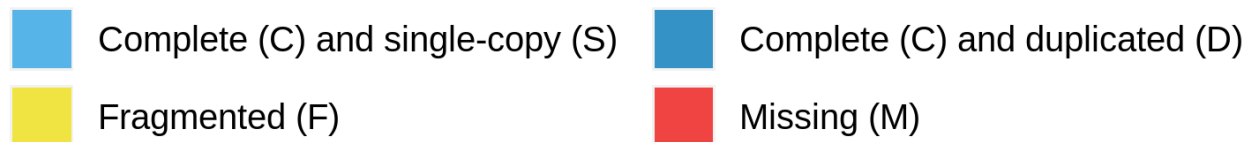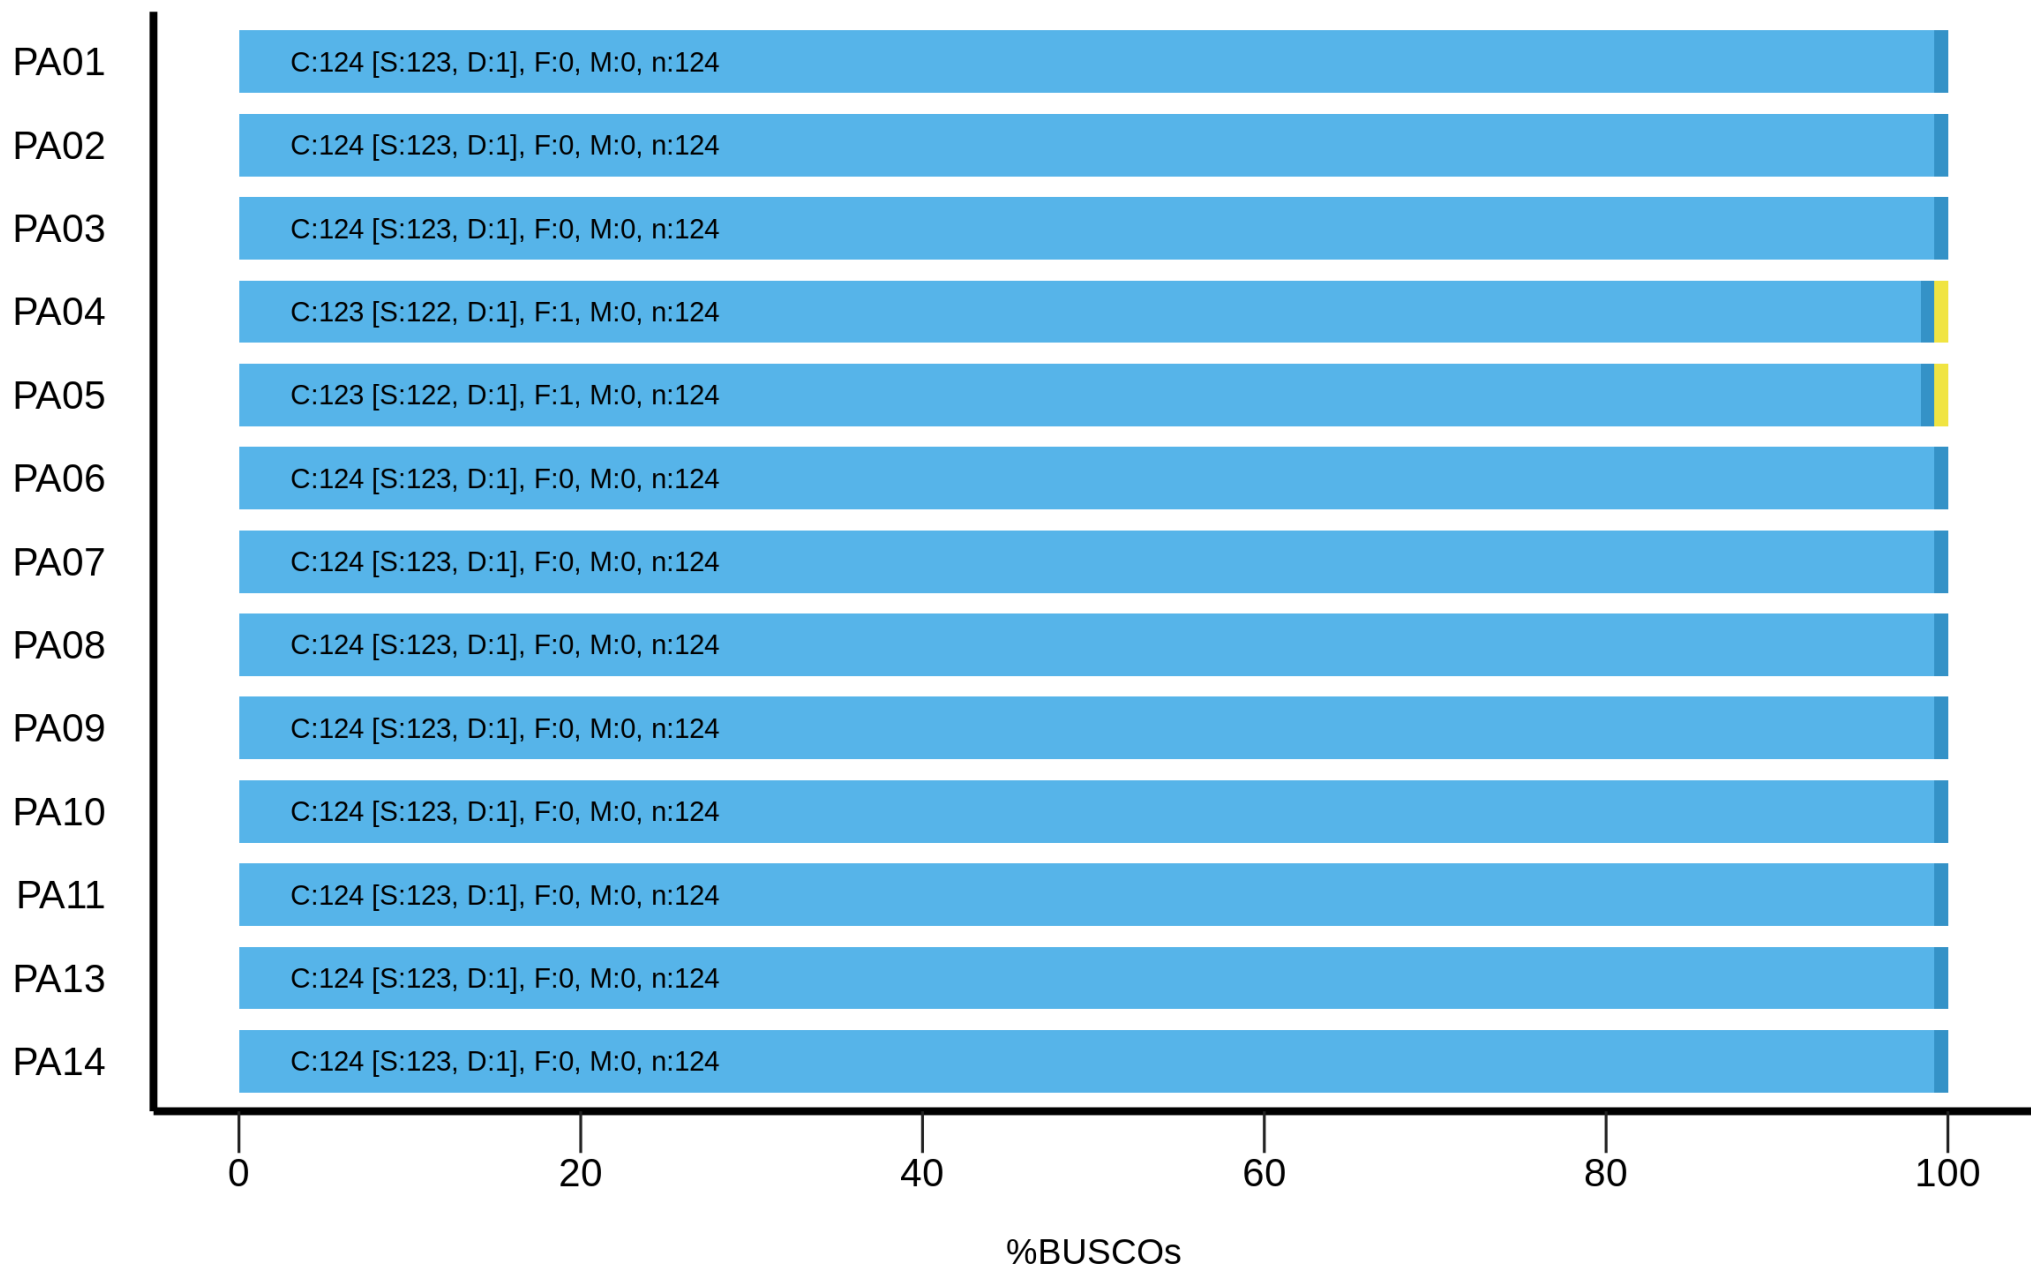

Supplement: s1 [file s1]
